1 **Title:**

2

3 **Partitioning the roles of insect and microbial enzymes in the**  
4 **metabolism of the insecticide imidacloprid in *Drosophila***  
5 ***melanogaster***

6

7 **Authors:**

8

9 Roberto Fusetto<sup>1,2</sup>, Shane Denecke<sup>2</sup>, Trent Perry<sup>2</sup>, Richard A. J. O’Hair<sup>1</sup> and  
10 Philip Batterham<sup>2</sup>

11 <sup>1</sup>School of Chemistry, Bio21 Institute of Molecular Science and Biotechnology, University of  
12 Melbourne, Melbourne, Victoria, 3010, Australia.

13 <sup>2</sup>School of Bioscience, Bio21 Institute of Molecular Science and Biotechnology, University of  
14 Melbourne, Melbourne, Victoria, 3010, Australia.

15

16

17 \* Author to whom correspondence should be addressed: Philip Batterham, Bio21 Institute of  
18 Molecular Science and Biotechnology, University of Melbourne, Melbourne, Victoria, 3010,  
19 Australia, Phone: +61 418 598 562, Email: [p.batterham@unimelb.edu.au](mailto:p.batterham@unimelb.edu.au)

20

21

22

23

24

25

26

27 **Key words:** imidacloprid, metabolism, CYP6G1, *Drosophila melanogaster*, mass  
28 spectrometry, microbiome.

29

30 **Abstract**

31 Resistance to insecticides through enhanced metabolism is a worldwide problem. The  
32 *Cyp6g1* gene of the vinegar fly, *Drosophila melanogaster*, is a paradigm for the study of  
33 metabolic resistance. Constitutive overexpression of this gene confers resistance to several  
34 chemical classes of insecticides, including the neonicotinoids exemplified by the insecticide  
35 imidacloprid (IMI). The metabolism of IMI in this species has been previously shown to  
36 yield oxidative and nitro-reduced metabolites. While levels of the oxidative metabolites are  
37 correlated with CYP6G1 expression, nitro-reduced metabolites are not, raising the question  
38 of how these metabolites are produced. Some IMI metabolites are known to be toxic, making  
39 their fate within the insect a second question of interest. These questions have been addressed  
40 by coupling the genetic tools of gene overexpression and CRISPR gene knock-out with the  
41 sensitive mass spectrometric technique, the Twin-Ion Method (TIM). Analysing axenic larvae  
42 indicated that microbes living within *D. melanogaster* are largely responsible for the  
43 production of the nitro-reduced metabolites. Knock-out of *Cyp6g1* revealed functional  
44 redundancy, with some metabolites produced by CYP6G1 still detected. IMI metabolism was  
45 shown to produce toxic products that are not further metabolized but readily excreted, even  
46 when produced in the Central Nervous System (CNS), highlighting the significance of  
47 transport and excretion in metabolic resistance.

48

49

50

## 51 **Introduction**

52 Insecticides have long been used to control insect pests that negatively impact agriculture  
53 and human health. Tobacco extracts and then pure (S)-nicotine, targeting nicotinic  
54 acetylcholine receptors (nAChRs), were the first insecticides used against pests around the  
55 world<sup>1</sup>. While effective, (S)-nicotine is more toxic to mammals than insects so advances in  
56 organic synthesis were exploited to produce nicotine derivatives (neonicotinoids), notably  
57 IMI, that have a higher affinity for insect nAChRs<sup>2-4</sup>. Recently, there have been major  
58 concerns about the impact of honeybee exposure to IMI and some other neonicotinoids<sup>5-7</sup> and  
59 the increasing number of pest species evolving resistance<sup>8-10</sup>. Determining the mechanisms by  
60 which pests develop resistance to insecticides is crucial to develop new control strategies for  
61 insecticide resistant pests. The vinegar fly, *Drosophila melanogaster*, has been shown to be a  
62 useful model system for the study of resistance mechanisms<sup>11,12</sup>.

63 The most common mechanism of neonicotinoid resistance involves the constitutive  
64 overexpression of drug metabolising enzymes (DMEs), particularly cytochrome P450  
65 monooxygenases of the CYP6 family<sup>13-15</sup>. *Cyp6g1* from *D. melanogaster* is the best  
66 characterized gene of this family<sup>16</sup>. Resistance to insecticides of diverse chemical structure,  
67 including IMI, is due to elevated transcript levels in key metabolic tissues (midgut, fat body  
68 and malpighian tubules), caused by the insertion of a long terminal repeat of the *Accord*  
69 retrotransposon upstream of the gene<sup>16-18</sup>. Further transposable element insertions and gene  
70 duplications have served to increase the levels of *Cyp6g1* transcript and resistance in natural  
71 populations around the world<sup>19,20</sup>. In the laboratory, it has been possible to reproduce such  
72 resistance using controlled tissue specific gene expression with the GAL4/UAS system and  
73 an *Accord* driver<sup>17,21</sup>.

74 Two distinct pathways of IMI metabolism have been observed in nature: oxidation and  
75 nitro-reduction (Figure 1). While both mechanisms have been established in mammals<sup>22,23</sup>

76 and plants<sup>24,25</sup>, nitro-reduction of IMI is the main mechanism used by soil bacteria<sup>26-28</sup> with  
77 the only exception being *Stenotrophomonas maltophilia*, which predominantly produces IMI-  
78 5-OH<sup>29</sup>. In insects, IMI-5-OH and IMI-Ole are the key metabolites identified in different  
79 insect species<sup>30,31</sup>. However, the predominant identification of IMI-Urea and 6-  
80 chloronicotinic acid (6-CNA) in midgut and rectum tissues of *Apis mellifera*<sup>32</sup> and the  
81 detection of nitro-reduced metabolites as major metabolites in the eastern subterranean  
82 termite, *Reticulitermes flavipes*<sup>33</sup>, show that IMI metabolism in insects is far from being  
83 understood.

84 The role of CYP6G1 in IMI metabolism was first examined using heterologous  
85 expression in tobacco (*Nicotiana tabacum*) cell culture<sup>34</sup>. Subsequently, the integration of the  
86 TIM with the selective tissue expression of *Cyp6g1* using the GAL4/UAS system permitted  
87 the *in vivo* study of IMI metabolism in *D. melanogaster*<sup>35</sup>. The oxidation products IMI-5-OH,  
88 IMI-diol, IMI-Ole and IMI-de were detected at levels that correlated with *Cyp6g1* expression  
89 in the insect. Significantly, nitro-reduced derivatives, IMI-NNO and IMI-NH, were also  
90 detected but their levels did not correlate with *Cyp6g1* expression. A number of these  
91 metabolites produced in the *D. melanogaster*, such as IMI-5-OH, IMI-Ole and IMI-NNO, are  
92 known to be toxic to insects<sup>36-38</sup>.

93 Here the IMI metabolites produced by *D. melanogaster* and the subset of these formed by  
94 CYP6G1 are identified. Evidence is presented for the existence of other fly enzymes capable  
95 of producing these same metabolites. Rapid excretion of toxic metabolites produced by  
96 CYP6G1 in either the metabolic tissues or the CNS is observed. Indeed, we have not found  
97 evidence of IMI detoxification in *D. melanogaster*, underlining the significance of the  
98 transport and excretion of metabolites after their production in the insect. Lastly, we observed  
99 the presence of IMI-5-OH and IMI-Ole metabolites in a *Cyp6g1* knock-out strain, confirming

100 the presence of at least one other metabolic gene capable of producing these IMI metabolites  
101 in this insect.

## 102 **Results**

103 **Microbial degradation of IMI.** Nitro-reduction of IMI is a biotransformation  
104 mechanism commonly found in soil bacteria<sup>26,27</sup>. In testing the hypothesis that the IMI-NH  
105 and IMI-NNO metabolites previously observed in *D. melanogaster*<sup>35</sup> are produced by gut  
106 microbes, we examined the levels of these metabolites in axenic and non-axenic control  
107 larvae.

108 Neither IMI-NNO nor IMI-NH was detectable in axenic or control larvae exposed to  
109 IMI, but these metabolites were detected in the media in which both types of larvae were  
110 exposed. Significantly, the levels were 5 times lower in the media in which axenic larvae had  
111 been exposed (Figure 2, A). In contrast, there were no significant differences between the  
112 levels of the oxidative metabolites, IMI-5-OH and IMI-Ole, detected in the axenic and  
113 control larvae. Indeed, the levels of IMI-5-OH in the axenic larvae and their control were  $2.4$   
114  $\pm 1.1$  and  $2.8 \pm 0.2$  ppb while the levels of IMI-Ole were  $9.4 \pm 5.4$  and  $7.4 \pm 0.6$  ppb  
115 respectively. Similar observations were made comparing the levels of these metabolites in the  
116 media in which the axenic and control larvae were exposed (Figure 2, B and C). IMI-diol and  
117 IMI-de metabolites were not detected at these experimental conditions.

## 118 **The metabolites produced by CYP6G1.**

119

120 Previous studies have shown that *in vivo* over-expression of *Cyp6g1* in metabolic tissues of  
121 *D. melanogaster* using the GAL4/UAS system leads to increased production and excretion of  
122 IMI-5-OH, IMI-Ole, IMI-diol and IMI-de metabolites<sup>35</sup>, thus associating the action of  
123 CYP6G1 to the metabolism of IMI. However, it is still unknown which of these reactions are  
124 actually catalysed by CYP6G1 *in vivo*. In order to clarify the pathway of IMI metabolism and

125 the steps catalysed by CYP6G1, HR\_Cyp6g1 and control larvae were exposed to IMI and  
126 IMI-5-OH and the oxidative metabolites produced in the larvae and excreted in the media  
127 monitored using LC-MS.

128         Following exposure to IMI for 6 hrs, two times less IMI was detected in the bodies of  
129 HR\_Cyp6g1 larvae compared to the control. Levels of the metabolites IMI-5-OH and IMI-  
130 Ole were 1.7 and 3.7 times higher in the HR\_Cyp6g1 larvae at this time. IMI-Ole was the  
131 most abundant metabolite produced, reaching the concentration of  $118 \pm 5.7$  and  $32 \pm 2.2$  ppb  
132 in the HR\_Cyp6g1 and HR\_Φ86FB larvae, respectively (Figure 3, A). IMI-5-OH and IMI-  
133 Ole concentrations were higher in the media in which larvae had been exposed, with  
134 significantly more metabolites excreted by the HR\_Cyp6g1 strain. 7.8 times more IMI-5-OH  
135 and 11.5 times more IMI-Ole were excreted by HR\_Cyp6g1 compared to the control strain  
136 (Figure 3 B). The IMI-diol (Figure 3, C ) and IMI-de (Supplementary Figure S1) metabolites  
137 were detected only at low levels in the media. Their detection was only possible due to the  
138 presence of the  $^{13}\text{C}$ -isotope, which permitted the metabolite to be distinguished from the  
139 background noise.

140         The same genotypes were exposed to IMI-5-OH and the larvae and media were again  
141 analysed for metabolites (Figure 3 D-F). Only IMI-diol and IMI-Ole were detected. IMI-diol  
142 was only detected in the media where the levels were 3.6 times higher for the HR\_Cyp6g1  
143 genotype than the control (Figure 3 F). IMI-Ole was detected in the HR\_Cyp6g1 and the  
144 control larvae ( $107 \pm 9.7$  and  $106 \pm 28.2$  ppb) and in their respective exposure media ( $1300$   
145  $\pm 97.5$  and  $1100 \pm 340.7$  ppb). Differences in IMI-Ole levels between genotypes observed  
146 were not significant, suggesting that CYP6G1 did not catalyse the formation of this  
147 metabolite (Figure 3 D and E). Exposure to IMI-Ole did not lead to the detection of any other  
148 previously identified metabolites (Supplementary Figure S2).

149 **The kinetics of IMI metabolism when *Cyp6g1* is over-expressed in metabolic tissues.** The  
150 over-expression of *Cyp6g1* in metabolic tissues has been previously shown to confer IMI  
151 resistance, as measured by the Wiggle index (WI) assay<sup>39</sup>. In that study a significant  
152 difference in the level of movement between the HR\_*Cyp6g1* and control HR\_Φ86FB larvae  
153 was observed after 15 mins of IMI exposure. Here we chose to follow the kinetics of IMI  
154 metabolism in these same genotypes over a two hr time course, monitoring the levels of IMI  
155 metabolites produced and excreted over time.

156 Consistent with the WI data, overexpression of *Cyp6g1* in metabolic tissues leads to  
157 increased IMI metabolism (Figure 4). After 60 mins of exposure, the level of IMI present  
158 within the larval body was significantly lower for the HR\_*Cyp6g1* larvae. The levels of IMI  
159 in the media did not show any significant difference over time. (Figure 4 A and B).

160 A sharp increase in IMI-5-OH levels was observed after 15 mins in the HR\_*Cyp6g1*  
161 larvae. The maximum concentration of IMI-5-OH was reached between 30 and 60 mins ( $8$   
162  $\pm 0.7$  ppb). This was followed by a steady decrease in the second hr of exposure. In contrast,  
163 levels of IMI-5-OH did not change in the control larvae over the two hr time course. Excreted  
164 IMI-5-OH was observed in the media for both genotypes at the 15 min time point. After 30  
165 mins, significantly higher levels of IMI-5-OH were detected in the media for the HR\_*Cyp6g1*  
166 genotype compared to the control. After 2 hrs, 5 times more IMI-5-OH had accumulated in  
167 the media for the HR\_*Cyp6g1* genotype compared to the control (Figure 4, C and D).

168 IMI-Ole was present at significantly higher levels in the bodies of HR\_*Cyp6g1* larvae  
169 compared to control at all time points. In the HR\_*Cyp6g1* larvae, a sharp increase in the  
170 levels of IMI-Ole in the first 60 mins was followed by a small increase in the next 60 mins.  
171 For the control larvae, IMI-Ole was not detectable at 15 mins. IMI-Ole then gradually  
172 increased to a final concentration of  $11.7 \pm 0.4$  after 2 hrs, 7 fold lower than what was



173 observed in the HR\_Cyp6g1 strain. In examining the media, significantly more IMI-Ole was  
174 excreted by the HR\_Cyp6g1 larvae compared throughout the time course. The levels of IMI-  
175 Ole excreted by the HR\_Cyp6g1 genotype, first detected at 15 mins, gradually increased over  
176 the first 60 mins. The rate of excretion increased in the second half of the experiment. For the  
177 control, IMI-Ole was not found in the media until 60 mins with a slight increase occurring in  
178 the second hr. After two hrs, 10 times more IMI-Ole was detected in the media of the  
179 HR\_Cyp6g1 genotype compared to the control (Figure 4 E and F).

180 **The over-expression of *Cyp6g1* in the Central nervous system (CNS) provides an insight**  
181 **into the transport of the IMI-5-OH and IMI-Ole metabolites in larvae.** Over-expression  
182 of *Cyp6g1* in the CNS has been shown to significantly reduce the impact of IMI on larval  
183 movement after 30 mins of exposure<sup>39</sup>. These data suggest that CYP6G1 can reduce the  
184 effect of IMI in the CNS by quickly metabolising it. To test this hypothesis, we examined the  
185 levels of IMI and metabolites over a two hr time course in the Elav\_Cyp6g1 and  
186 Elav\_Φ86FB control larvae.

187 Similar to the observations in the HR\_Cyp6g1 experiment, IMI was rapidly  
188 metabolised into IMI-5-OH and IMI-Ole in Elav\_Cyp6g1 larvae (Figure 5). However, the  
189 levels of IMI detected in the Elav\_Cyp6g1 larvae were significantly different to the control  
190 only at the 2 hr time point ( $P < 0.05$ ). The amount of IMI in the media was equal for the two  
191 genotypes at all times. (Figure 5 A and B).

192 IMI-5-OH was identified in the larval bodies of both strains after 15 mins of IMI  
193 exposure. Consistently higher levels of IMI-5-OH were detected in the Elav\_Cyp6g1 larvae  
194 with 1.4 times more metabolite present after 2 hrs compared to the Elav\_Φ86FB control.  
195 IMI-5-OH was identified in the media of both strains starting from 15 mins. After 60 mins  
196 significantly more IMI-5-OH was excreted by the Elav\_Cyp6g1 genotype. Over the two hr

197 assay, 2.2 times more IMI-5-OH was excreted by the *Elav\_Cyp6g1* genotype compared to the  
198 *Elav\_Φ86FB* control (Figure 5 C and D).

199 IMI-Ole was rapidly formed in the *Elav\_Cyp6g1* larvae being detected at the 15 min  
200 time point while this metabolite was first detected in the *Elav\_Φ86FB* controls starting from  
201 60 mins. Over the two hr exposure, 2.2 times more IMI-Ole was produced by *Elav\_Cyp6g1*  
202 larvae compared to the *Elav\_Φ86FB* control. IMI-Ole was detected in the media of the  
203 *Elav\_Cyp6g1* genotype starting from 60 mins while one more hr was required to observe  
204 IMI-Ole in the media for the control. After 2 hrs, 2.6 times more IMI-Ole was excreted by  
205 *Elav\_Cyp6g1* larvae (Figure 5, E and F).

206 **Measuring IMI metabolism in a CYP6G1 knock-out strain.** Many other DMEs are  
207 expressed in the metabolic tissues of *D. melanogaster* larvae<sup>39</sup> but their capacity to contribute  
208 to IMI metabolism and resistance remains largely untested. Denecke *et al.* (this issue)  
209 presented evidence that the selective knock-out of the two copies of the *Cyp6g1* gene from  
210 the insecticide resistant strain RAL\_517 (RAL\_517-Cyp6g1KO) significantly increases the  
211 susceptibility to IMI. As this would imply a reduction or loss of IMI metabolism in the insect,  
212 we verified this hypothesis analysing the change in metabolism of IMI in the larvae and  
213 media of the RAL\_517 and RAL\_517-Cyp6g1KO strains respectively.

214 Under the experimental conditions used in this research, loss of *Cyp6g1* function  
215 affected the metabolism of IMI in the RAL\_517-Cyp6g1KO strain compared to the RAL\_517  
216 control. 1.5 and 3.8 times less IMI-5-OH and IMI-Ole, respectively, were detected in the  
217 RAL\_517-Cyp6g1KO larvae compared to the RAL\_517 control (Figure 6A). As a  
218 consequence, 1.8 times more IMI was detected in the body of the RAL\_517-Cyp6g1KO  
219 larvae. RAL\_517-Cyp6g1KO also excreted less IMI-5-OH and IMI-Ole than the RAL\_517  
220 control. 10 and 12.8 times less IMI-5-OH and IMI-Ole were detected in the media of

221 RAL\_517-Cyp6g1KO compared to the RAL\_517 control (Figure 6B). Low levels of IMI-diol  
222 and IMI-de metabolites were detected only in the media of the RAL\_517 genotype. A similar  
223 metabolic response was observed at the same experimental conditions reported by Denecke *et*  
224 *al* (this issues) (Supplementary Figure S4). Although the loss of CYP6G1 in *D. melanogaster*  
225 drastically affected the metabolism of IMI, the oxidative metabolites, IMI-5-OH and IMI-  
226 Ole, were still observed in the larval bodies and exposure media of the RAL\_517-Cyp6g1KO  
227 strain at both exposure conditions used. Therefore CYP6G1 cannot be considered the only  
228 enzyme responsible for the metabolism of IMI in the insect.

229

## 230 **Discussion**

231 Like many other insecticides, the targets of IMI are in the CNS. Hence, toxicity  
232 depends on the concentrations of insecticide and/or toxic metabolites that enter the CNS and  
233 the extent to which they can be effluxed from it. The major metabolites of IMI produced in  
234 *D. melanogaster* had been previously defined. These included the oxidative metabolites IMI-  
235 5-OH, IMI-Ole and IMI-diol, the de-ethylation product of IMI, IMI-de, the nitro-reduced  
236 derivatives IMI-NNO and IMI-NH, the epoxidation product of IMI and the hydroxyl-  
237 derivative of IMI-NH<sup>35</sup>. The latter two were not detected in our study. Using tissue specific  
238 gene expression our data allows the *in vivo* contribution of one gene, *Cyp6g1*, to IMI  
239 metabolism to be characterised and quantified. CYP6G1 is revealed to be an enzyme that  
240 produces metabolites that are toxic but readily excreted, underlining the significance of yet to  
241 be identified transporters in the response to IMI. As shown by our data, metabolites can be  
242 partitioned into those produced by *D. melanogaster* (oxidative metabolites) and those  
243 produced by microbes within the fly (nitro-reduced metabolites).

244 Microbes living within the  $w^{1118}$  strain make a significant contribution to the nitro-  
245 reduction of IMI (Figure 2). In the absence of microbes the amount of IMI-NNO and IMI-NH  
246 excreted by the axenic  $w^{1118}$  larvae was significantly reduced, while oxidative metabolism  
247 was unaffected. In Aphids, IMI-NNO is more toxic than IMI, while IMI-NH has low level  
248 toxicity<sup>38</sup>. While the toxicity of these compounds has not been tested here, it appears likely  
249 that they do not reach the CNS, as they were not detected in larval bodies but were present in  
250 the exposure media (Figure 2B). IMI-NNO and IMI-NH metabolites can therefore be defined  
251 as microbial metabolites (Figure 7). The identification of IMI-NH and IMI-Ole-NH  
252 metabolites (Figure 1) in *R. flavipes*<sup>33</sup> and the identification of IMI-Urea in metabolic tissues  
253 of *A. mellifera*<sup>32</sup> reveals that nitro-reduction of IMI is also present in other insects. Although  
254 the role of gut bacteria in resistance to different plant secondary metabolites (e.g. terpenes  
255 and glucosinolates) have been reported in several species<sup>40-42</sup>, evidence of their possible  
256 contribution in insecticide resistance<sup>43</sup> and metabolism<sup>44</sup> is more limited. The role of  
257 microbiota in resistance to insecticides is still at its infancy and more studies are required to  
258 address this question in detail. Nonetheless, in future caution must be applied in attributing  
259 levels of insecticide metabolism and resistance to the over-expression of insect metabolic  
260 enzymes without first investigating whether there is a microbial contribution.

261 *D. melanogaster* typically harbour a limited number of bacterial species in the gut that  
262 are capable of establishing a strong symbiotic relationship with the host by regulating  
263 different physiological mechanisms included growth, immune response and the recycling of  
264 nutrients<sup>45</sup>. Bacteria within the larval midgut would be exposed to orally ingested IMI, as  
265 would the *D. melanogaster* metabolic enzymes expressed there<sup>46</sup>. Bacteria with the capacity  
266 to metabolise insecticides have been used as tools for the bioremediation of insecticide  
267 residues in the environment<sup>26,47</sup>. Hence, there may be value in identifying the species

268 responsible for the IMI metabolism reported here. Many of the bacterial species commonly  
269 found in *D. melanogaster* can be cultured, so this may be possible.

270 That the levels of IMI-NNO and IMI-NH were not reduced to zero in axenic larvae is  
271 consistent with the hypothesis that there are one or more *D. melanogaster* enzymes that  
272 catalyse the nitro-reduction of IMI. CYP6G1 has been ruled out as a candidate for this  
273 activity<sup>35</sup>, since the over-expression of the *Cyp6g1* gene does not impact the levels of these  
274 metabolites. In looking for other enzymes capable of producing these metabolites, it is  
275 necessary to look beyond insects, since there are no reported examples of insect enzymes  
276 with this capacity. P450s in human<sup>23</sup> and Alcohol Oxidase (AOX) in mouse<sup>48</sup> have been  
277 shown to possess the ability to nitro-reduce IMI.

278 The oxidative metabolism of IMI in *D. melanogaster* is a complex pathway composed  
279 of several steps (Figure 7). We distinguish between two classes of oxidative metabolites,  
280 those formed by CYP6G1 activity (CYP6G1-catalysed) and those dependent on the  
281 expression of CYP6G1 (CYP6G1-dependent).

282 IMI-5-OH and IMI-diol are CYP6G1-catalysed metabolites. Oxidation of IMI in  
283 position 5 of the imidazolidine ring forms IMI-5-OH and then further hydroxylation in  
284 position 4 forms IMI-diol. This two-step process previously observed *in vitro*<sup>34</sup> has been  
285 shown here to occur *in vivo*. Exposure to IMI-5-OH revealed a significant increase in the  
286 IMI-diol detected in the HR\_Cyp6g1 media compared to the control (Figure 3F). Joußen, *et*  
287 *al* (2008)<sup>34</sup> identified IMI-4-OH as a CYP6G1 catalysed metabolite. We have not been able  
288 to detect this metabolite in *D. melanogaster*.

289 In mice and plants, IMI-Ole is formed by dehydration of IMI-5-OH<sup>22,24,38</sup>. *In vitro*,  
290 studies indicated that CYP6G1 does not catalyse the conversion of IMI-5-OH into IMI-Ole<sup>34</sup>.  
291 This was confirmed to be the case *in vivo* by the exposure of the HR\_Cyp6g1 and control

292 genotypes to IMI-5-OH (Figure 3D and E). The over-expression of *Cyp6g1* in the metabolic  
293 tissues of the HR\_Cyp6g1 genotype does not affect levels of IMI-Ole produced and excreted  
294 by this strain compared to the control. As such, it can be deduced that the increasing levels of  
295 IMI-Ole observed in the HR\_Cyp6g1 strain when exposed to IMI are due to the increasing  
296 amount of the substrate, IMI-5-OH, produced by the over-expression of *Cyp6g1* in metabolic  
297 tissues (Figure 3A and B).

298 The IMI-de metabolite observed in spinach<sup>24</sup>, and previously detected in *D.*  
299 *melanogaster*<sup>35</sup>, has also been observed here. IMI-de formation can be explained by de-  
300 ethylation on the imidazolidine ring of IMI<sup>24</sup> or loss of ethylene glycol from the IMI-diol  
301 metabolite. Detection of IMI-de in the media of the HR\_Cyp6g1 strain after exposure to IMI  
302 (Supplementary Figure S1), but not after exposure to IMI-5-OH, indicates that IMI-de may  
303 be produced by IMI de-ethylation. That it was not detected in the HR\_Φ86FB strain suggests  
304 that CYP6G1 could play a role in this conversion.

305 By quantifying IMI metabolites, we established that over-expression of *Cyp6g1* in the  
306 metabolic tissues increases the amount of the oxidative metabolites within larvae and the  
307 amount excreted (Figure 3A and B). This observation was confirmed in the two hr time  
308 course assay where only IMI-5-OH and IMI-Ole were detected (Figure 4). Significantly  
309 higher levels of metabolites detected in the HR\_Cyp6g1 larvae and their media between 15  
310 and 30 mins suggest that ingested IMI is rapidly metabolised by CYP6G1 in the metabolic  
311 tissues and that IMI-5-OH and IMI-Ole are excreted in the media of exposure as they are  
312 formed. These data are consistent with a previous report that there is a significant difference  
313 in motility between the HR\_Cyp6g1 and control strains after only 15 mins of exposure to  
314 IMI<sup>49</sup>. The over-expression of *Cyp6g1* in the metabolic tissues reduces the levels of IMI in  
315 larval bodies reducing the toxicity of this insecticide (Figure 4A).

316           The 60 min time point marks a noteworthy change in the trends observed for IMI-5-  
317 OH and IMI-Ole levels in the HR\_Cyp6g1 strain (Figure 4C-F). Rapid metabolism of IMI in  
318 the first 60 mins of exposure, observed as increase of IMI-5-OH and IMI-Ole, is  
319 accompanied by a proportional amount of these metabolites being released into the media.  
320 After 60 mins, the production of IMI-5-OH and IMI-Ole slows down in the body with not  
321 sensitive change while excretion continues at a high efficiency. This process is visible after 6  
322 hrs of exposure of the HR\_Cyp6g1 strain to either IMI or IMI-5-OH. While similar levels of  
323 IMI-Ole can be detected for both chemical used, 4 and 13 times more IMI-Ole is excreted by  
324 this strain upon exposure to IMI and IMI-5-OH respectively (Figure 3).

325           A similar metabolic trend is observed with the over-expression of *Cyp6g1* in the CNS  
326 (Figure 5). Significant levels of IMI-5-OH and IMI-Ole observed after 15 mins in the  
327 *Elav\_Cyp6g1* larvae indicate that IMI can reach the CNS in a relatively short time where it is  
328 metabolised by CYP6G1 into IMI-5-OH. While the detection of IMI-5-OH in the media in  
329 the first 30 mins reflects the base-level expression of *Cyp6g1* in the metabolic tissues of both  
330 strains, the significantly higher levels of IMI-5-OH and IMI-Ole observed after 60 mins  
331 indicate that metabolites produced in the CNS are excreted out of the larvae. For this to  
332 occur, metabolites produced in the CNS must cross the blood brain barrier, diffuse into the  
333 hemolymph and reach the malpighian tubules for excretion into the media. As the production  
334 of IMI-Ole is not catalysed by CYP6G1, it is not clear whether it is produced in the CNS or  
335 not.

336           Although resistance is attributed to the over-expression of *Cyp6g1*, CYP6G1 does not  
337 actually detoxify IMI. It rather produces IMI-5-OH, which leads to the production of IMI-  
338 Ole. Both metabolites are toxic in *D. melanogaster* and are likely to bind to at least one  
339 nAChR subunit targeted by IMI (Supplementary Figure S3). That these metabolites are less  
340 toxic than IMI in *D. melanogaster* could be explained if they are less able to enter the CNS,

341 have a lower binding affinity for nAChRs and/or if they are more readily excreted. That  
342 excretion plays a vital role in the capacity of an insect to survive to insecticide exposure is  
343 particularly evident with IMI-Ole, a metabolite produced at high concentration and known to  
344 be more toxic than IMI in pest species like *M. persicae*, *A. gossypii*<sup>38</sup> and *Bemisia tabaci*<sup>37</sup>,  
345 and in the honeybee *Apis mellifera*<sup>36</sup>. While the basis of these differences in toxicity between  
346 species have not been established, they can be explained by mechanisms canvassed here. In  
347 the case of *D. melanogaster* our data show rapid excretion of IMI-5-OH, IMI-Ole, IMI-de,  
348 IMI-NNO and IMI-NH. The capacity to transport and excrete these metabolites is crucial to  
349 the survival under conditions of exposure to toxic concentrations of IMI. This has been  
350 reported by Denecke *et al* (this issue) where the hypersensitivity of one strain (RAL\_509  
351 strain) to IMI can be explained by its reduced capacity of eliminate the toxic metabolites IMI-  
352 5-OH and IMI-Ole, that accumulate within the insect body. CYP6G1 metabolises IMI, but  
353 detoxification depends on the excretion of IMI and the metabolites produces. Our data,  
354 combined with evidence linking candidate genes such as ABC transporters to insecticide  
355 resistance<sup>50,51</sup>, suggest that the sequential activity of DMEs and transporters may be  
356 important contributor to the resistance to a range of insecticides. More research needs to be  
357 devoted to identifying the specific transporters involved in moving insecticides/metabolites  
358 between tissues to the point of excretion.

359 Finally, the analysis of a *Cyp6g1* knock-out mutant revealed the presence of  
360 metabolites normally associated with CYP6G1 activity, indicating functional redundancy and  
361 confirming the role of at least one other gene in the metabolism of the insecticide. Our data  
362 show that the increased susceptibility to IMI observed with the RAL\_517-Cyp6g1KO  
363 genotype (Denecke *et al.* this issue) correlates with a significant decrease in production of  
364 IMI-5-OH and IMI-Ole compared to the control RAL\_517 (Figure 6). A similar metabolic  
365 result is observed after only one hour of exposure at the same conditions used by (this issue)



366 (Supplementary Figure S4). However, the persistence of IMI-5-OH and IMI-Ole metabolites  
367 in the RAL\_517-Cyp6g1KO strain, albeit at lower levels, indicates that one or more  
368 metabolic enzymes can contribute to the metabolism of IMI. That the same metabolites  
369 normally produced by *Cyp6g1* are detected suggest that a P450 may be involved in this  
370 enzymatic conversion, possibly one closely related to *Cyp6g1*<sup>52</sup>. *Cyp6g2* is one candidate.  
371 Denecke *et al.* (this issue) have shown that there is a significant level of expression of this  
372 gene in the metabolic tissues of RAL\_517 and that transgenic overexpression of the gene  
373 leads to both elevated levels IMI-5-OH and IMI-Ole and IMI resistance. Any mutation that  
374 leads such a gene to be over-expressed in a similar tissue-specific pattern to *Cyp6g1* or in the  
375 CNS would be likely to confer insecticide resistance, in the absence of significant fitness  
376 costs. Candidate genes can be readily tested with controlled gene overexpression<sup>21</sup> and their  
377 role in insecticides metabolism can be assessed using LC-MS.

378

## 379 **Materials and Methods**

380 **Chemicals.** IMI (N-[1-[(6-Chloro-3-pyridyl)methyl]-4,5-dihydroimidazol-2-yl]nitramide)  
381 and [<sup>13</sup>C<sub>6</sub>]-IMI (>99% isotopic purity; >97% total purity) were obtained from AK Scientific  
382 (Union City, CA, USA) and IsoSciences (King of Prussia, PA, USA), respectively. Authentic  
383 standards of IMI-Ole (N-[1-[(6-chloro-3-pyridyl)methyl]-1,3-dihydro-2H-imidazol-2-  
384 ylidene]nitramide) and IMI-5-OH (N-(1-[(6-chloro-3-pyridyl)methyl]-5-  
385 hydroxyimidazolidin-2-ylidene]nitramide) were provided by Bayer CropScience AG  
386 (Monheim, Germany). Sucrose was obtained from Chem-Supply (Gillman, SA, Australia)  
387 and glacial formic acid from AnalaR (supplied by BDH, Poole, Great Britain). HPLC grade  
388 acetonitrile, ethyl acetate, and HPLC grade methanol were obtained from Merck (Kenilworth,

389 NJ, U.S.A.). 18.2 M $\Omega$  HPLC grade water was obtained from Honeywell (Morristown, NJ,  
390 USA).

391 ***D. melanogaster* genotypes and rearing conditions.** Tissue-specific over-expression  
392 of *Cyp6g1* was used to identify and monitor metabolites produced by CYP6G1. Over-  
393 expression was achieved by crossing the 5'HR\_GAL4 Hikone R (Accord) driver line<sup>53</sup> or the  
394 Elav\_GAL4 ([Bloomington Drosophila Stock Center](#) #458) driver line with a UAS-Cyp6g1  
395 line<sup>46</sup>. These crosses generate progeny, which over-express *Cyp6g1* in metabolic tissues  
396 (UAS\_Cyp6g1-86FB  $\times$  5'HR\_GAL4, referred to as HR\_Cyp6g1) or in the CNS  
397 (UAS\_Cyp6g1-86FB  $\times$  Elav\_GAL4 referred to as Elav\_Cyp6g1). A control genotype,  
398 differing only in *Cyp6g1* tissue-specific expression levels, was generated by crossing the  
399 5'HR\_GAL4 and Elav\_GAL4 driver lines to the  $\Phi$ 86FB genotype<sup>54</sup> referred to as  
400 HR\_ $\Phi$ 86FB and Elav\_ $\Phi$ 86FB respectively. Flies were reared at 25 °C and raised in bottles  
401 filled with rich media food (Supplementary, Table S1).

402 **Axenic larvae preparation.** Axenic larvae of *D.melanogaster* were allowed to develop from  
403 embryos that were decontaminated and dechorionated under a laminar flow cabinet<sup>55</sup>. Flies  
404 from the susceptible *w*<sup>1118</sup> strain ([Bloomington Drosophila Stock Center](#) #3605) were  
405 collected in cages and allowed to lay eggs on grape juice plates (Supplementary information,  
406 Table S1). Every 2 hrs, cages were moved onto new grape juice plates. Freshly laid embryos  
407 were collected and sterilized using a dilute solution of bleach (2.5% v/v) for 2 mins, followed  
408 by a 30 second wash in ethanol (70% v/v) and finally rinsed with sterilized distilled water for  
409 one min. Eggs deprived of the external shell were selected under the microscope and gently  
410 transferred on autoclaved rich media food containing 50 and 20 mg/L of ampicillin and  
411 chloramphenicol, respectively. The glass vials used for the exposure, the lysing matrix tubes,  
412 and the different solutions of sucrose used in the experiment were autoclaved before use.

413 **Insecticide exposure and metabolite extraction process.** The exposure and  
414 extraction conditions employed to test and extract IMI and metabolites from larvae of *D.*  
415 *melanogaster* were described elsewhere<sup>35</sup>. Briefly, eggs were laid on rich media food for 24  
416 hrs. After 4 days, larvae were extracted from the food using a 15% sucrose solution. Larvae  
417 were gently transferred onto a mesh, rinsed with more sucrose solution and counted under a  
418 microscope to ensure that only early third instar larvae were used in the experiments. For  
419 each experiment or time point, three biological replicates of 200 early third instar larvae were  
420 prepared. Larvae were exposed to a fresh solution of 50:50 ratio of <sup>12</sup>C<sub>6</sub> and <sup>13</sup>C<sub>6</sub>-IMI (total  
421 concentration 6ppm) dissolved in 200μL of a 5% (w/v) sucrose solution. For exposures to  
422 IMI-5-OH and IMI-Ole, the solution was composed only of the <sup>12</sup>C isotope. At the end of  
423 each experiment, the exposure media and larvae were separated and transferred into lysing  
424 matrix tubes containing 1.4 mm ceramic beads (MP biomedical, Santa Ana, California,  
425 USA). 1000 μL of distilled water was used to wash larvae prior to collection. The biological  
426 samples were milled using a Cryomil (Precellys 24, Bertin Technologies, Montigny-le-  
427 Bretonneux, France) operated at -10°C. IMI and its metabolites were then extracted using  
428 ethyl acetate. The extraction was repeated three times and the fractions combined in 2.0 mL  
429 tubes and evaporated to dryness under vacuum.

430 **LC/MS analysis.** The analysis of IMI and metabolites using TIM has been previously  
431 reported<sup>35</sup>. Briefly, dried samples were resuspended in 250 μL of HPLC grade water and  
432 analysed using an Agilent 1100 HPLC autosampler system with a reverse-phase C18 column  
433 (2.6 μm, 3.0 × 100 mm, Kinetex XB-C18, Phenomenex, Inc., Torrance, California, USA)  
434 coupled to an Agilent 6520 Q-TOF mass spectrometer (Agilent Technologies, Inc., Santa  
435 Clara, CA, USA). The ionisation of IMI and its metabolites was achieved using a dual-  
436 nebulizer ESupplementary source with the following settings: capillary voltage, +3 kV; gas  
437 temperature (nitrogen), 300° C; dry gas, 12 L min<sup>-1</sup>; nebulizer, 50 psig. The flow rate was

438 maintained at 0.3 mL/min and the total run was about 25 mins. Separation was achieved  
439 using a two solvent gradient consisting of (Phase 1) 100% H<sub>2</sub>O and (Phase 2) a 70:30:0.1%  
440 (v/v) mixtures of acetonitrile:H<sub>2</sub>O:formic acid, respectively. IMI and its metabolites were  
441 analysed in both ionisation modes. Only IMI and its major metabolites IMI-5-OH and IMI-  
442 Ole were quantified. This was achieved using negative ionisation mode and through external  
443 calibration curves generated by diluted solutions of pure standards (n=8) ranging from 1 ppb  
444 (part per billion) to 3 ppm (part per milion). The signal-to-noise ratio (S/N) equal to 3:1 was  
445 chosen as Level of Detection (LOD) while a S/N equal to 5:1 was used as Level of  
446 Quantification (LOQ) since quantification is determined from the sum of the areas produced  
447 by both isotopes. The LOQ for IMI, IMI-5-OH and IMI-Ole was  $\approx$ 1-2 ppb. The levels of the  
448 metabolites were averaged among the three biological replications of each genotype and a  
449 Student's t-test was performed to determine if significant difference existed between any two  
450 genotypes being compared. The standard deviation was plotted with average values for each  
451 metabolite to represent the variability among the three biological replicates. In the text  
452 mean $\pm$ SD is shown for metabolites.

## 453 **Acknowledgements**

454 The authors thank the University of Melbourne for the provision of the postgraduate and  
455 writing up scholarships to Roberto Fusetto and Shane Denecke and to all members of the  
456 O'Hair and Batterham research groups for their support. We thank Metabolomics Australia  
457 and the University of Melbourne Department of Chemistry for access to facilities and Sioe  
458 See Volaric for technical assistance with the analytical instrumentation.

## 459 **Author contributions**

460 R.F and Ph.B: Writing the manuscript

461 R.F, S.D, T.P, R.O'H and Ph.B: Editing the manuscript

462 R.F, S.D and T.P: Laboratory Work

463 R.F, S.D, T.P: Analysis of data

464 Ph.B, R.O'H: Funding and overall project design

## 465 **Additional information**

466 **Supplementary information** accompanies this paper.

467 **Competing financial interests:** The authors declare no competing financial interests.

## 468 **References**

469 1 Fusetto, R. & O'Hair, R. A. Nicotine as insecticide in Australia: a short history.  
470 *Chemistry in Australia*, 18-21 (Oct 2015).

471 2 Jeschke, P., Nauen, R., Schindler, M. & Elbert, A. Overview of the status and global  
472 strategy for neonicotinoids. *J. Agric. Food Chem.* **59**, 2897-2908 (2011).

473 3 Tomizawa, M. & Casida, J. E. Molecular recognition of neonicotinoid insecticides: The  
474 determinants of life or death. *Acc. Chem. Res.* **42**, 260-269 (2009).

475 4 Tomizawa, M. & Casida, J. E. Unique neonicotinoid binding conformations conferring  
476 selective receptor interactions. *J. Agric. Food Chem.* **59**, 2825-2828 (2011).

477 5 Blacquiere, T., Smagghe, G., van Gestel, C. A. M. & Mommaerts, V. Neonicotinoids in  
478 bees: a review on concentrations, side-effects and risk assessment. *Ecotoxicology* **21**,  
479 973-992 (2012).

480 6 Stokstad, E. Pesticides under fire for risks to pollinators. *Science* **340**, 674-676 (2013).

481 7 Whitehorn, P. R., O'Connor, S., Wackers, F. L. & Goulson, D. Neonicotinoid pesticide  
482 reduces bumble bee colony growth and queen production. *Science* **336**, 351-352  
483 (2012).

484 8 Bass, C., Denholm, I., Williamson, M. S. & Nauen, R. The global status of insect  
485 resistance to neonicotinoid insecticides. *Pestic. Biochem. Physiol.* **121**, 78-87 (2015).

- 486 9 Bass, C. *et al.* The evolution of insecticide resistance in the peach potato aphid,  
487 *Myzus persicae*. *Insect Biochem. Mol. Biol.* **51**, 41-51 (2014).
- 488 10 Casida, J. E. & Durkin, K. A. Neuroactive insecticides: targets, selectivity, resistance,  
489 and secondary effects. *Annu. Rev. Entomol.* **58**, 99-117 (2013).
- 490 11 ffrench-Constant, R. H. The molecular genetics of insecticide resistance. *Genetics*  
491 **194**, 807-815 (2013).
- 492 12 Perry, T., Batterham, P. & Daborn, P. J. The biology of insecticidal activity and  
493 resistance. *Insect Biochem. Mol. Biol.* **41**, 411-422 (2011).
- 494 13 Bass, C. *et al.* Overexpression of a cytochrome P450 monooxygenase, CYP6ER1, is  
495 associated with resistance to imidacloprid in the brown planthopper, *Nilaparvata*  
496 *lugens*. *Insect Mol. Biol.* **20**, 763-773 (2011).
- 497 14 Karunker, I. *et al.* Over-expression of cytochrome P450 CYP6CM1 is associated with  
498 high resistance to imidacloprid in the B and Q biotypes of *Bemisia tabaci* (Hemiptera  
499 : *Aleyrodidae*). *Insect Biochem. Mol. Biol.* **38**, 634-644 (2008).
- 500 15 Puinean, A. M. *et al.* Amplification of a cytochrome P450 gene is associated with  
501 resistance to neonicotinoid insecticides in the aphid *Myzus persicae*. *PLoS Genet.* **6**,  
502 e1000999 (2010).
- 503 16 Le Goff, G. & Hilliou, F. Resistance evolution in *Drosophila*: the case of CYP6G1. *Pest*  
504 *Manag. Sci.*, In press (2016).
- 505 17 Chung, H. *et al.* Cis-regulatory elements in the Accord retrotransposon result in  
506 tissue-specific expression of the *Drosophila melanogaster* insecticide resistance gene  
507 *Cyp6g1*. *Genetics* **175**, 1071-1077 (2007).
- 508 18 Daborn, P. J. *et al.* A single P450 allele associated with insecticide resistance in  
509 *Drosophila*. *Science* **297**, 2253-2256 (2002).
- 510 19 Catania, F. *et al.* World-wide survey of an Accord insertion and its association with  
511 DDT resistance in *Drosophila melanogaster*. *Mol. Ecol.* **13**, 2491-2504 (2004).
- 512 20 Schmidt, J. M. *et al.* Copy number variation and transposable elements feature in  
513 recent, ongoing adaptation at the *Cyp6g1* locus. *PLoS Genet.* **6**, e1000998 (2010).
- 514 21 Daborn, P. J. *et al.* Evaluating the insecticide resistance potential of eight *Drosophila*  
515 *melanogaster* cytochrome P450 genes by transgenic over-expression. *Insect*  
516 *Biochem. Mol. Biol.* **37**, 512-519 (2007).

- 517 22 Ford, K. A. & Casida, J. E. Chloropyridinyl neonicotinoid insecticides: Diverse  
518 molecular substituents contribute to facile metabolism in mice. *Chem. Res. Toxicol.*  
519 **19**, 944-951 (2006).
- 520 23 Schulz-Jander, D. A. & Casida, J. E. Imidacloprid insecticide metabolism: human  
521 cytochrome P450 isozymes differ in selectivity for imidazolidine oxidation versus  
522 nitroimine reduction. *Toxicol. Lett.* **132**, 65-70 (2002).
- 523 24 Ford, K. A. & Casida, J. E. Comparative metabolism and pharmacokinetics of seven  
524 neonicotinoid insecticides in spinach. *J. Agric. Food Chem.* **56**, 10168-10175 (2008).
- 525 25 Thurman, E. M., Ferrer, I., Zavitsanos, P. & Zweigenbaum, J. A. Identification of  
526 imidacloprid metabolites in onion (*Allium cepa* L.) using high-resolution mass  
527 spectrometry and accurate mass tools. *Rapid Commun. Mass Spectrom.* **27**, 1891-  
528 1903 (2013).
- 529 26 Pandey, G., Dorrian, S. J., Russell, R. J. & Oakeshott, J. G. Biotransformation of the  
530 neonicotinoid insecticides imidacloprid and thiamethoxam by *Pseudomonas sp* 1G.  
531 *Biochem. Biophys. Res. Commun.* **380**, 710-714 (2009).
- 532 27 Sharma, S., Singh, B. & Gupta, V. K. Assessment of imidacloprid degradation by soil-  
533 isolated *Bacillus alkalinitrilicus*. *Environ. Monit. Assess.* **186**, 7183-7193 (2014).
- 534 28 Lu, T.-Q. *et al.* Regulation of hydroxylation and nitroreduction pathways during  
535 metabolism of the neonicotinoid insecticide imidacloprid by *Pseudomonas putida*. *J.*  
536 *Agric. Food Chem.* **64**, 4866-4875 (2016).
- 537 29 Dai, Y. J. *et al.* Microbial hydroxylation of imidacloprid for the synthesis of highly  
538 insecticidal olefin imidacloprid. *Appl. Microbiol. Biotechnol.* **71**, 927-934 (2006).
- 539 30 Nishiwaki, H., Sato, K., Nakagawa, Y., Miyashita, M. & Miyagawa, H. Metabolism of  
540 imidacloprid in houseflies. *J. Pestic. Sci.* **29**, 110-116 (2004).
- 541 31 Rauch, N. & Nauen, R. Identification of biochemical markers linked to neonicotinoid  
542 cross resistance in *Bemisia tabaci* (Hemiptera: Aleyrodidae). *Arch. Insect Biochem.*  
543 *Physiol.* **54**, 165-176 (2003).
- 544 32 Suchail, S., De Sousa, G., Rahmani, R. & Belzunces, L. P. *In vivo* distribution and  
545 metabolisation of <sup>14</sup>C-imidacloprid in different compartments of *Apis mellifera* L.  
546 *Pest Manag. Sci.* **60**, 1056-1062 (2004).

- 547 33 Tomalski, M., Leimkuehler, W., Schal, C. & Vargo, E. L. Metabolism of imidacloprid in  
548 workers of *Reticulitermes flavipes* (Isoptera: Rhinotermitidae). *Ann. Entomol. Soc.*  
549 *Am.* **103**, 84-95 (2010).
- 550 34 Joußen, N., Heckel, D. G., Haas, M., Schuphan, I. & Schmidt, B. Metabolism of  
551 imidacloprid and DDT by P450 CYP6G1 expressed in cell cultures of *Nicotiana*  
552 *tabacum* suggests detoxification of these insecticides in *Cyp6g1*-overexpressing  
553 strains of *Drosophila melanogaster*, leading to resistance. *Pest Manag. Sci.* **64**, 65-73  
554 (2008).
- 555 35 Hoi, K. K. *et al.* Dissecting the insect metabolic machinery using twin ion mass  
556 spectrometry: A single P450 enzyme metabolizing the insecticide imidacloprid *in*  
557 *vivo*. *Anal. Chem.* **86**, 3525-3532 (2014).
- 558 36 Nauen, R., Ebbinghaus-Kintscher, U. & Schmuck, R. Toxicity and nicotinic  
559 acetylcholine receptor interaction of imidacloprid and its metabolites in *Apis*  
560 *mellifera* (Hymenoptera: Apidae). *Pest Manag. Sci.* **57**, 577-586 (2001).
- 561 37 Nauen, R., Reckmann, U., Armbrorst, S., Stupp, H. P. & Elbert, A. Whitefly-active  
562 metabolites of imidacloprid: Biological efficacy and translocation in cotton plants.  
563 *Pestic. Sci.* **55**, 265-271 (1999).
- 564 38 Nauen, R., Tietjen, K., Wagner, K. & Elbert, A. Efficacy of plant metabolites of  
565 imidacloprid against *Myzus persicae* and *Aphis gossypii* (Homoptera: Aphididae).  
566 *Pestic. Sci.* **52**, 53-57 (1998).
- 567 39 Robinson, S. W., Herzyk, P., Dow, J. A. T. & Leader, D. P. FlyAtlas: database of gene  
568 expression in the tissues of *Drosophila melanogaster*. *Nucleic Acids Res.* **41**, D744-  
569 D750 (2013).
- 570 40 Adams, A. S. *et al.* Mountain pine beetles colonizing historical and naive host trees  
571 are associated with a bacterial community highly enriched in genes contributing to  
572 terpene metabolism. *Appl. Environ. Microbiol.* **79**, 3468-3475 (2013).
- 573 41 Ceja-Navarro, J. A. *et al.* Gut microbiota mediate caffeine detoxification in the  
574 primary insect pest of coffee. *Nat. Commun.* **6** (2015).
- 575 42 van den Bosch, T. J. M. & Welte, C. U. Detoxifying symbionts in agriculturally  
576 important pest insects. *Microbial Biotechnology*, In press (2016).



- 577 43 Xia, X. F. *et al.* DNA sequencing reveals the midgut microbiota of Diamondback moth,  
578 *Plutella xylostella* (L.) and a possible relationship with insecticide resistance. *PLoS*  
579 *One* **8**, 8 (2013).
- 580 44 Kikuchi, Y. *et al.* Symbiont-mediated insecticide resistance. *Proc. Natl. Acad. Sci. U. S.*  
581 *A.* **109**, 8618-8622 (2012).
- 582 45 Chandler, J. A., Lang, J. M., Bhatnagar, S., Eisen, J. A. & Kopp, A. Bacterial  
583 communities of diverse *Drosophila* species: Ecological context of a host-microbe  
584 model system. *PLoS Genet.* **7**, e1002272 (2011).
- 585 46 Harrop, T. W., Pearce, S. L., Daborn, P. J. & Batterham, P. Whole-genome expression  
586 analysis in the third instar larval midgut of *Drosophila melanogaster*. *G3 (Bethesda,*  
587 *Md.)* **4**, 2197-2205 (2014).
- 588 47 Scott, C. *et al.* The enzymatic basis for pesticide bioremediation. *Indian Journal of*  
589 *Microbiology* **48**, 65-79 (2008).
- 590 48 Swenson, T. L. & Casida, J. E. Aldehyde oxidase importance *in vivo* in xenobiotic  
591 metabolism: imidacloprid nitroreduction in mice. *Toxicol. Sci.* **133**, 22-28 (2013).
- 592 49 Denecke, S., Nowell, C. J., Fournier-Level, A., Perry, T. & Batterham, P. The Wiggle  
593 Index: an open source bioassay to assess sub-lethal insecticide response in  
594 *Drosophila melanogaster*. *PLoS One* **10**, e0145051 (2015).
- 595 50 Dermauw, W. & Van Leeuwen, T. The ABC gene family in arthropods: Comparative  
596 genomics and role in insecticide transport and resistance. *Insect Biochem. Mol. Biol.*  
597 **45**, 89-110 (2014).
- 598 51 Merzendorfer, H. in *Target Receptors in the Control of Insect Pests: Pt II* Vol. 46  
599 *Advances in Insect Physiology* (ed E. Cohen) 1-72 (2014).
- 600 52 Good, R. T. *et al.* The molecular evolution of cytochrome P450 genes within and  
601 between *Drosophila* species. *Genome Biol. Evol.* **6**, 1118-1134 (2014).
- 602 53 Daborn, P. J. *et al.* Using *Drosophila melanogaster* to validate metabolism-based  
603 insecticide resistance from insect pests. *Insect Biochem. Mol. Biol.* **42**, 918-924  
604 (2012).
- 605 54 Bischof, J., Maeda, R. K., Hediger, M., Karch, F. & Basler, K. An optimized transgenesis  
606 system for *Drosophila* using germ-line-specific  $\phi$ C31 integrases. *Proc. Natl. Acad. Sci.*  
607 *U. S. A.* **104**, 3312-3317 (2007).

- 608 55 Venu, I., Durisko, Z., Xu, J. & Dukas, R. Social attraction mediated by fruit flies'  
609 microbiome. *J. Exp. Biol.* **217**, 1346-1352 (2014).
- 610 56 Perry, T. *et al.* Effects of mutations in *Drosophila* nicotinic acetylcholine receptor  
611 subunits on sensitivity to insecticides targeting nicotinic acetylcholine receptors.  
612 *Pestic. Biochem. Physiol.* **102**, 56-60 (2012).
- 613 57 Perry, T., Heckel, D. G., McKenzie, J. A. & Batterham, P. Mutations in D $\alpha$ 1 or D $\beta$ 2  
614 nicotinic acetylcholine receptor subunits can confer resistance to neonicotinoids in  
615 *Drosophila melanogaster*. *Insect Biochem. Mol. Biol.* **38**, 520-528 (2008).
- 616 58 Hoekstra, J. A. Acute bioassays with control mortality. *Water, Air, Soil Pollut.* **35**, 311-  
617 317 (1987).
- 618 59 Rosenheim, J. A. & Hoy, M. A. Confidence Intervals for the Abbott's Formula  
619 Correction of Bioassay Data for Control Response. *J. Econ. Entomol.* **82**, 331-335  
620 (1989).

621

622

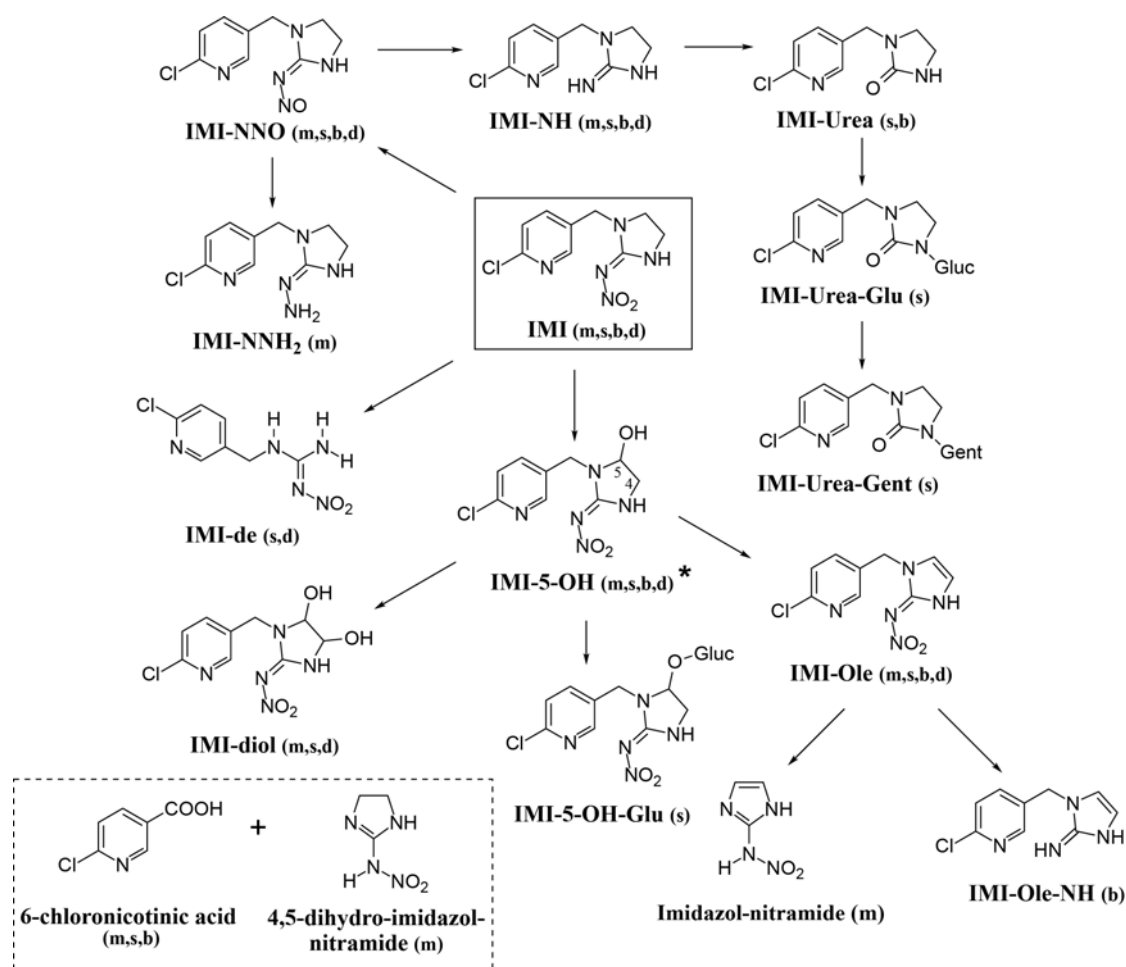

623

624 **Figure 1** The metabolites of IMI identified in mice<sup>22</sup> (m), spinach<sup>24</sup> (s), soil bacteria<sup>28</sup> (b), and *D.*  
 625 *melanogaster*<sup>35</sup> (d). Two main mechanisms of metabolism: oxidation and nitro-reduction. Oxidation on the  
 626 imidazolidine ring of IMI produces IMI-5-OH and IMI-diol, while nitro-reduction generates IMI-NNO, IMI-  
 627 NNH<sub>2</sub>, IMI-NH and IMI-Urea. Other metabolic reactions observed are dehydration (IMI-Ole), O- and N-  
 628 conjugation of glucose (IMI-5-OH-Glu and IMI-Urea-Glu) and gentamicin (IMI-Urea-Gent) and deethylation of  
 629 IMI (IMI-de). Formation of 6-Chloronicotinic acid and 4,5-dihydro-imidazol-nitramide is observed as direct  
 630 products of IMI (dashed box). (\*) Hydroxylation of IMI in position 4 on the imidazolidine ring, IMI-4-OH, was  
 631 reported in *Nicotiana tabacum* cell cultures expressing CYP6G1<sup>34</sup>.

632

633

634

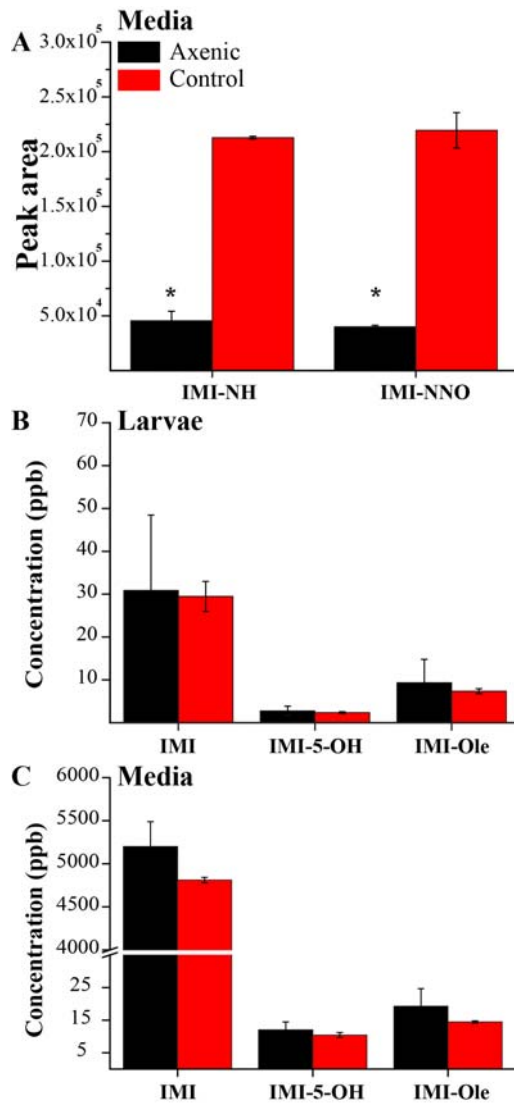

**Figure 2 Metabolism in axenic larvae.** (A) The amount of IMI-NH and IMI-NNO (reported as peak area) retrieved in the exposure media for axenic larvae (black) and controls (red). (B-C) The concentration of IMI, IMI-5-OH and IMI-Ole retrieved from the larvae and the exposure media for axenic and control larvae after a 6 hr exposure in a 6ppm solution of <sup>12</sup>C<sub>6</sub> -<sup>13</sup>C<sub>6</sub> IMI (50:50 ratio). Significance is indicated by an asterisk and is calculated by comparing the levels of each metabolite detected in the axenic strain compared with the control. [The data represent the mean±SD; (n=3); Student-t-test: P≤0.01 (\*\*), P≤0.05 (\*)].

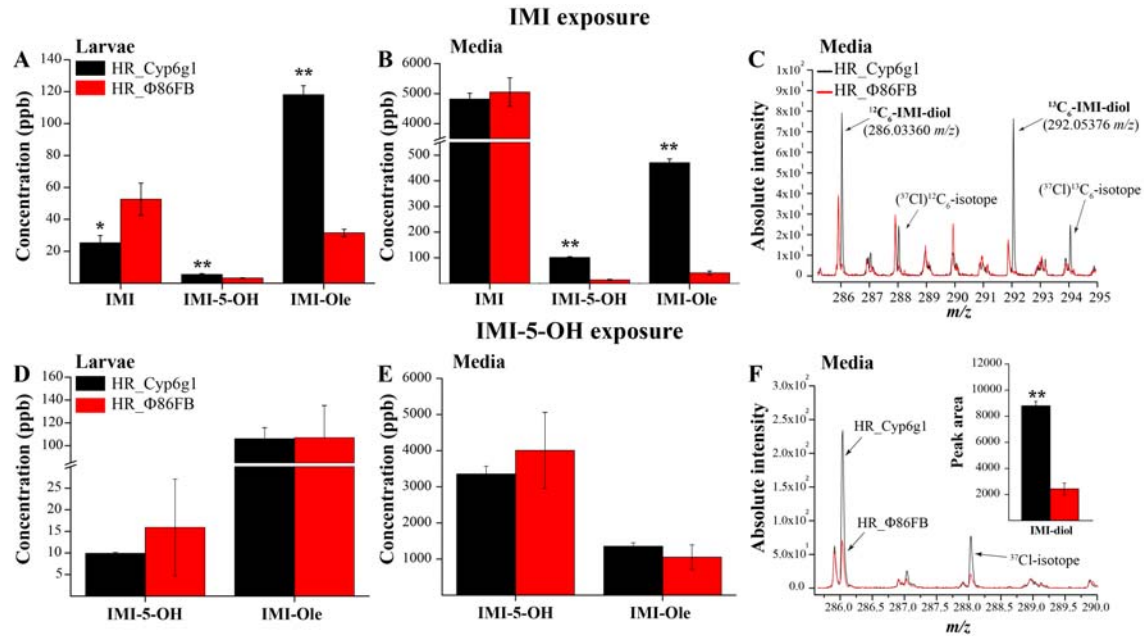

648

649 **Figure 3 The metabolism of IMI and IMI-5-OH reported in the larvae and media of the HR\_Cyp6g1**  
 650 **(black) and HR\_Φ86FB (red) strains.** Significantly less IMI and significantly more IMI-5-OH and IMI-Ole  
 651 are detected in the HR\_Cyp6g1 larvae and their respective media after exposure to IMI for six hrs. More IMI-  
 652 Ole than IMI-5-OH was detected in these conditions (A-B). The IMI-diol metabolite (286.03360  $m/z$ ) was  
 653 detected only in the HR\_Cyp6g1 media. Its identification was facilitated by to the isotopic mass difference of  
 654  $\approx 6.0201$  mass units between the  $^{12}\text{C}_6$  and the  $^{13}\text{C}_6$ - metabolites and the presence of the chlorine isotope ( $^{37}\text{Cl}$ )  
 655 (C). Exposure to IMI-5-OH revealed that HR\_Cyp6g1 and HR\_Φ86FB strains produce and excrete equal levels  
 656 of IMI-Ole (D-E). Significantly higher levels of IMI-diol were detected in the HR\_Cyp6g1 media (black line)  
 657 compared to the control (red line) (F). Significance (indicated with asterisks) is determined comparing the levels  
 658 of the metabolites produced and excreted by the HR\_Cyp6g1 strain against its HR\_Φ86FB control [The data  
 659 represent the mean $\pm$ SD; (n=3); Student-t-test:  $P \leq 0.01$  (\*\*),  $P \leq 0.05$  (\*)].

660

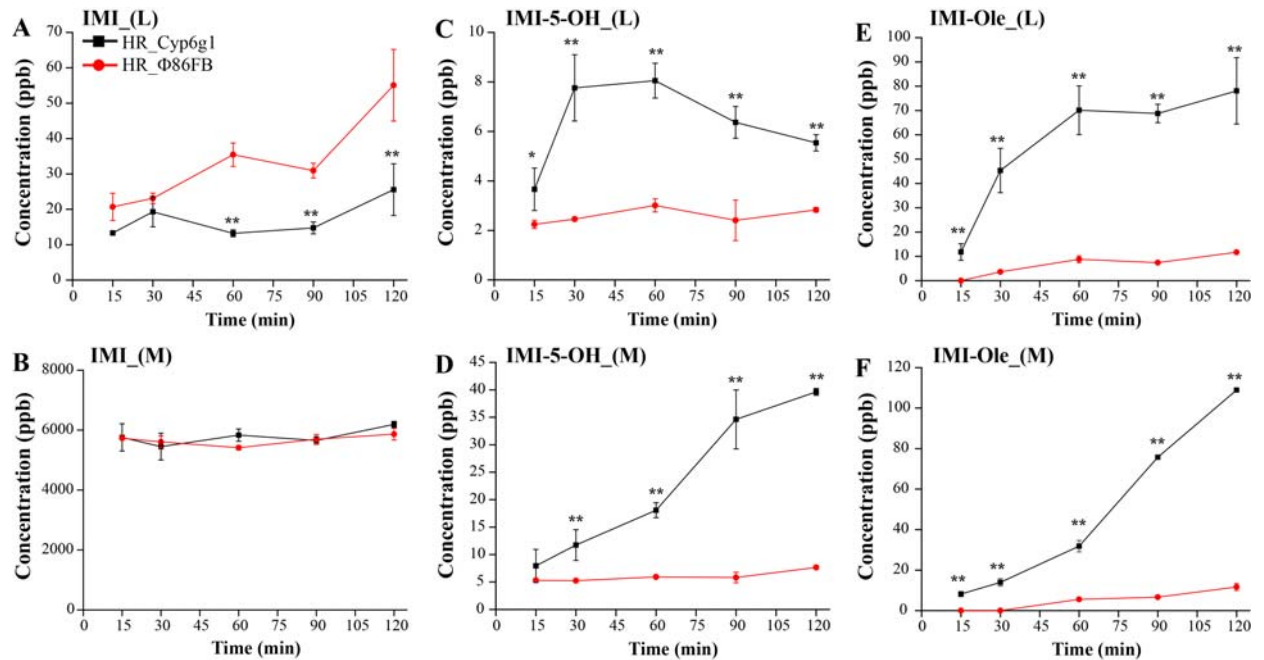

661

662 **Figure 4 Time course metabolism of IMI in the HR\_Cyp6g1 (black) and HR\_Φ86FB (red) strains.** The  
663 profile of IMI (A-B), IMI-5-OH (C-D) and IMI-Ole (E-F) detected in larvae (L) and media (M) over two hr  
664 assay. Significance (indicated with asterisks) is determined comparing the levels of the metabolites produced  
665 and excreted by the HR\_Cyp6g1 strain against its HR\_Φ86FB control [The data represent the mean±SD; (n=3);  
666 Student-t-test: P<0.01 (\*\*), P<0.05 (\*)].

667

668

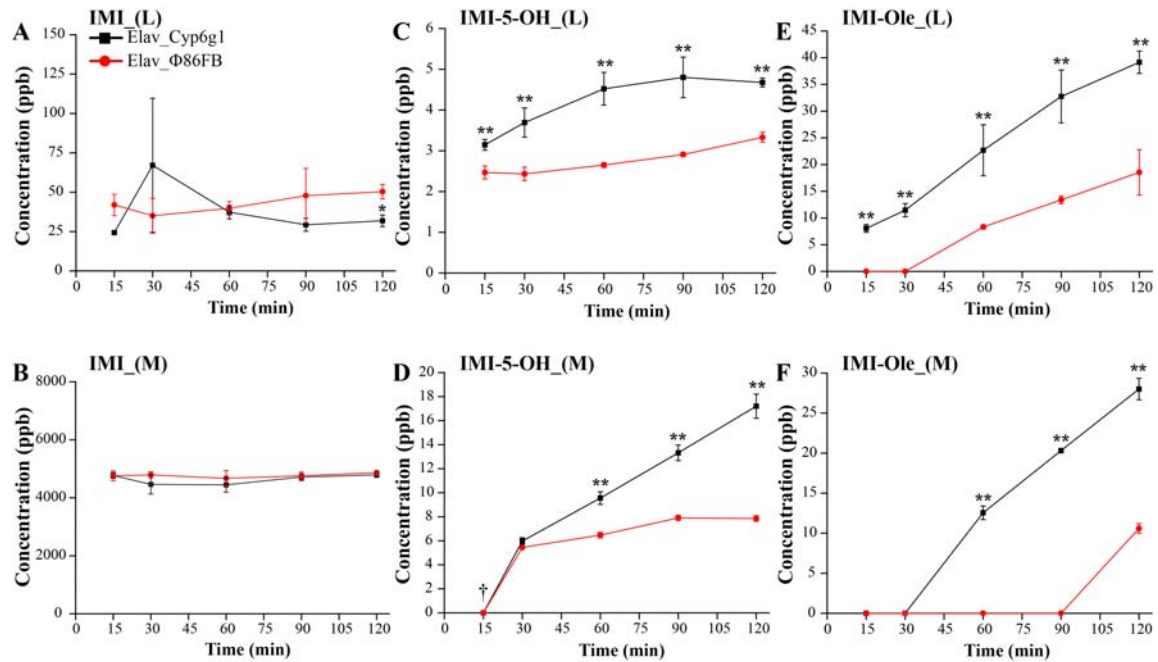

669  
 670 **Figure 5 Time course metabolism of IMI in the Elav\_Cyp6g1 (black) and Elav\_Φ86FB (red) strains.** The  
 671 profile of IMI (A-B), IMI-5-OH (C-D) and IMI-Ole (E-F) detected in larvae (L) and media (M) over two hr  
 672 exposure period. IMI-5-OH was successfully detected in the media of both genotypes at 15 minutes (†) but its  
 673 intensity was below the LOQ. Significance (indicated with asterisks) is determined comparing the levels of the  
 674 metabolites produced and excreted by the Elav\_Cyp6g1 strain against its Elav\_Φ86FB control [The data  
 675 represent the mean±SD; (n=3); Student-t-test: P≤0.01 (\*\*), P≤0.05 (\*)].

676

677

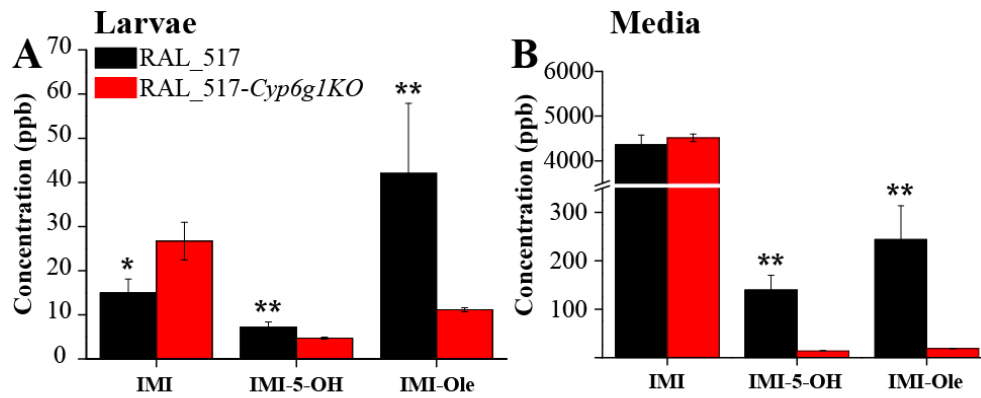

678

679 **Figure 6 The metabolism of IMI detected in the larvae (A) and media (B) of the RAL\_517 (black) and**  
680 **RAL\_517-Cyp6g1KO (red) strains.** Metabolism of IMI was identified after 6 hrs of exposure to a 6 ppm  
681 solution of IMI. Significantly more IMI-5-OH and IMI-Ole are produced and excreted by RAL\_517 compared  
682 to the knock-out strain. Significance (indicated with asterisks) is determined comparing the levels of the  
683 metabolites produced and excreted by the RAL\_517-Cyp6g1KO genotype with the RAL\_517 parental control  
684 [The data represent the mean±SD; (n=4); Student-t-test: P≤0.01 (\*\*), P≤0.05 (\*)].

685



686

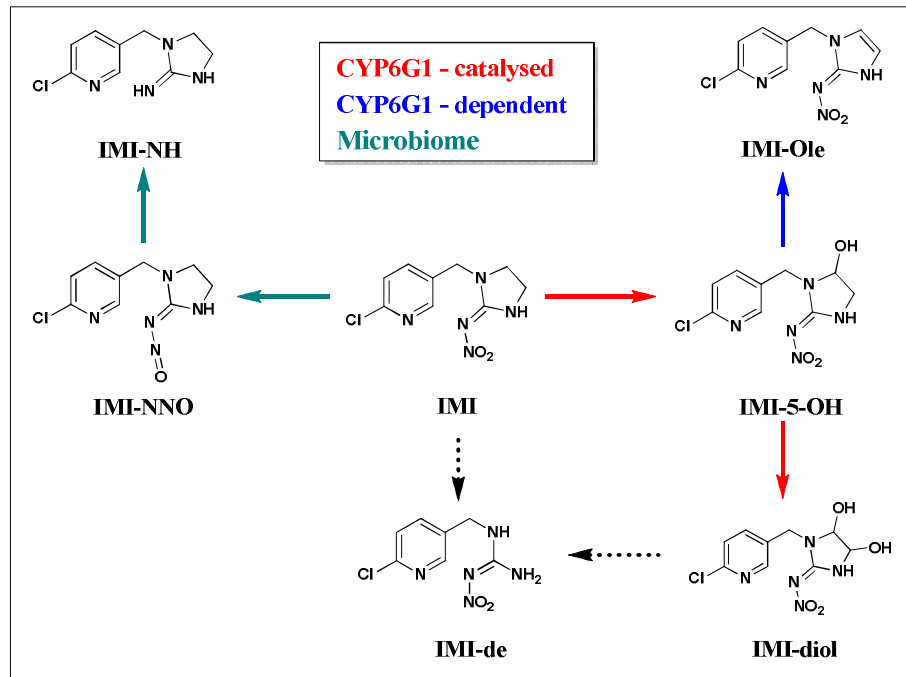

687

688 **Figure 7 The metabolism of IMI in *D. melanogaster*.** Red, blue and green arrows represent CYP6G1-  
689 catalysed, CYP6G1-dependent and microbial metabolites respectively. Dashed arrows leading to IMI-de are  
690 used to indicate the two possible pathways by which IMI-de could be formed.

691

692

693

694

695
